# Supplementary material for: Cystatin C, a novel indicator of renal function, reflects severity of cerebral microbleeds
Source: PubMed Central journal article supplement (PMC4077563; doi:10.1186/1471-2377-14-127), 2014-06-12
Supplement: 1471-2377-14-127-S1.pdf [file 1471-2377-14-127-S1.pdf]

Supplemental table1, proportional ordinal logistic regression for the grades of CMBs using the categories of estimated GFR and cystatin C quartiles.

| Variables                                             | N   | unadjusted OR | 95% CI    | <i>p</i> | adjusted OR | 95% CI    | <i>p</i> |
|-------------------------------------------------------|-----|---------------|-----------|----------|-------------|-----------|----------|
| Categories of estimated GFR,ml/min/1.73m <sup>2</sup> |     |               |           |          |             |           |          |
| C4(≤15.0)                                             | 13  | 1.38          | 0.45-4.23 | 0.30     | 1.68        | 0.19-1.87 | 0.38     |
| C3(15.0-45.0)                                         | 33  | 1.25          | 0.75-2.08 | 0.17     | 1.86        | 0.26-1.10 | 0.09     |
| C2(45.0-60.0)                                         | 70  | 2.24          | 1.17-4.31 | <0.01    | 1.41        | 0.41-1.22 | 0.22     |
| C1(≥60.0),ref                                         | 567 |               |           |          |             |           |          |
| <i>p</i> for trend                                    |     |               |           | <0.01    |             |           | 0.06     |
| Quartiles of Cystatin C, nmol/L                       |     |               |           |          |             |           |          |
| Q4(≥66.7)                                             | 168 | 2.19          | 1.40-3.40 | <0.01    | 2.03        | 1.19-3.47 | <0.01    |
| Q3(54.7-66.7)                                         | 173 | 1.57          | 0.92-2.46 | 0.10     | 1.34        | 0.44-1.26 | 0.27     |
| Q2(47.2-54.7)                                         | 162 | 0.98          | 0.61-1.58 | 0.16     | 1.59        | 0.91-2.79 | 0.11     |
| Q1(≤47.2), ref                                        | 180 |               |           |          |             |           |          |
| <i>p</i> for trend                                    |     |               |           | <0.01    |             |           | <0.01    |

\* adjusted for covariates; age, sex, total cholesterol, diabetes, hypertension, dyslipidemia, previous heart disease, smoking, previous anti thrombotic or anticoagulant use, and white matter lesions
