# Supplementary material for: Cystatin C, a novel indicator of renal function, reflects severity of cerebral microbleeds
Source: PubMed Central journal article supplement (PMC4077563; doi:10.1186/1471-2377-14-127), 2014-06-12
Supplement: 1471-2377-14-127-S4.pdf [file 1471-2377-14-127-S4.pdf]

Supplemental table 4. proportional ordinal logistic regression for the grades of CMBs without the patients with renal failure

| Variables                        | N   | unadjusted<br>OR | 95% CI    | <i>p</i> | adjusted<br>OR | 95% CI    | <i>p</i> |
|----------------------------------|-----|------------------|-----------|----------|----------------|-----------|----------|
| Quartiles of Cystatin C, nmol/L  |     |                  |           |          |                |           |          |
| Q4( $\geq 66.7$ )                | 156 | 2.40             | 1.40-3.40 | <0.01    | 2.06           | 1.07-3.94 | <0.01    |
| Q3(54.7-66.7)                    | 172 | 1.85             | 1.10-3.13 | 0.02     | 2.20           | 1.18-4.09 | 0.01     |
| Q2(47.2-54.7)                    | 162 | 1.45             | 0.61-1.58 | 0.16     | 1.36           | 0.78-2.36 | 0.49     |
| Q1( $\leq 47.2$ ), ref           | 180 |                  |           |          |                |           |          |
| <i>p</i> for trend               |     |                  |           | <0.01    |                |           | <0.01    |
| Quartiles of albumin/creatinine, |     |                  |           |          |                |           |          |
| Q4( $\geq 0.10$ )                | 150 | 1.39             | 0.77-2.53 | 0.28     | 1.34           | 0.71-1.43 | 0.30     |
| Q3(0.02-.0.10)                   | 133 | 1.21             | 0.67-2.20 | 0.30     | 1.28           | 0.73-1.48 | 0.25     |
| Q2(0.01-0.02)                    | 217 | 1.25             | 0.40-1.62 | 0.36     | 0.86           | 0.53-1.61 | 0.64     |
| Q1( $\leq 0.01$ ),ref            | 170 |                  |           |          |                |           |          |
| <i>p</i> for trend               |     |                  |           | 0.10     |                |           | 0.25     |

\* adjusted for covariates; age, sex, total cholesterol, diabetes, hypertension, dyslipidemia, previous heart disease, smoking, previous anti thrombotic or anticoagulant use, and white matter lesions
